# Supplementary material for: Prognostic impacts of extracranial metastasis on non‐small cell lung cancer with brain metastasis: A retrospective study based on surveillance, epidemiology, and end results database
Source: PubMed Central journal article supplement (PMC7877345; doi:10.1002/cam4.3562), 2020-12-15
Supplement: CAM4-10-471-s004.pdf [file CAM4-10-471-s004.pdf]

A

| Variables                                                   | OS   |             |         |
|-------------------------------------------------------------|------|-------------|---------|
|                                                             | HR   | 95%CI       | P value |
| Age (21-49 vs 50-59 vs >=60y )                              | 1.25 | (1.18,1.33) | <0.001  |
| Race(white vs black vs other vs unknow)                     | 0.85 | (0.80,0.90) | <0.001  |
| Gender (famale vs male)                                     | 1.18 | (1.10,1.27) | <0.001  |
| Marriage (Single vs married vs unknow*)                     | 0.93 | (0.87,0.99) | 0.030   |
| Grade (I vs II vs III vs IV vs unknow)                      | 0.99 | (0.96,1.01) | 0.312   |
| Pathology (AD vs SCC vs LCC vs Other*)                      | 1.14 | (1.09,1.19) | <0.001  |
| Stage T (T1 vs T2 vs T3 vsT4)                               | 1.08 | (1.05,1.12) | <0.001  |
| Stage N (N1vs N2 vsN3 vsN4 vs Nx)                           | 1.07 | (1.04,1.11) | <0.001  |
| Primary site surgery (No vs Yes)                            | 0.66 | (0.45,0.98) | 0.038   |
| Radiotherapy (No vs Yes)                                    | 0.93 | (0.75,1.14) | 0.471   |
| Chemotherapy (No vs Yes)                                    | 0.30 | (0.27,0.32) | <0.001  |
| Number of involved extracranial organs (0 vs 1 vs 2 vs >=3) | 1.21 | (1.16,1.26) | <0.001  |

Abbreviation: HR: hazard ratio; 95% CI: 95% confidence interval; AD: adenocarcinoma; SCC: squamous cell carcinoma; LCC: large cell carcinoma; OS: overall survival

B

| Variables                                                   | CSS  |             |         |
|-------------------------------------------------------------|------|-------------|---------|
|                                                             | HR   | 95%CI       | P value |
| Age (21-49 vs 50-59 vs >=60y )                              | 1.14 | (1.07,1.21) | <0.001  |
| Race(white vs black vs other vs unknow)                     | 0.94 | (0.88,0.99) | 0.032   |
| Gender (famale vs male)                                     | 1.04 | (0.97,1.12) | 0.290   |
| Marriage (Single vs married vs unknow*)                     | 0.98 | (0.91,1.05) | 0.482   |
| Grade (I vs II vs III vs IV vs unknow)                      | 1.02 | (0.99,1.05) | 0.327   |
| Pathology (AD vs SCC vs LCC vs Other*)                      | 1.09 | (1.04,1.14) | <0.001  |
| Stage T (T1 vs T2 vs T3 vsT4)                               | 1.07 | (1.03,1.11) | <0.001  |
| Stage N (N1vs N2 vsN3 vsN4 vs Nx)                           | 1.04 | (1.00,1.08) | 0.042   |
| Primary site surgery (No vs Yes)                            | 1.15 | (0.78,1.71) | 0.485   |
| Radiotherapy (No vs Yes)                                    | 0.91 | (0.73,1.13) | 0.391   |
| Chemotherapy (No vs Yes)                                    | 0.34 | (0.31,0.37) | <0.001  |
| Number of involved extracranial organs (0 vs 1 vs 2 vs >=3) | 1.14 | (1.10,1.19) | <0.001  |

Abbreviation: HR: hazard ratio; 95% CI: 95% confidence interval; AD: adenocarcinoma; SCC: squamous cell carcinoma; LCC: large cell carcinoma; CSS: cancer-specific survival
