# Supplementary material for: Prognostic impacts of extracranial metastasis on non‐small cell lung cancer with brain metastasis: A retrospective study based on surveillance, epidemiology, and end results database
Source: PubMed Central journal article supplement (PMC7877345; doi:10.1002/cam4.3562), 2020-12-15
Supplement: CAM4-10-471-s007.pdf [file CAM4-10-471-s007.pdf]

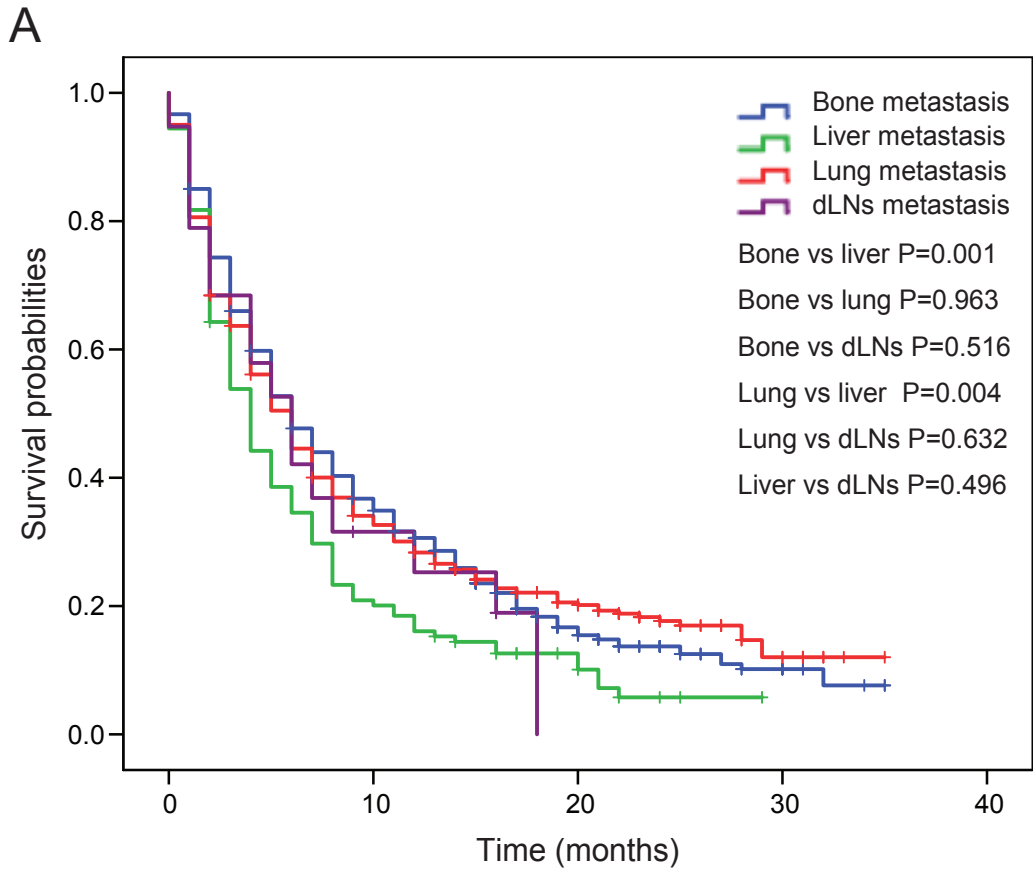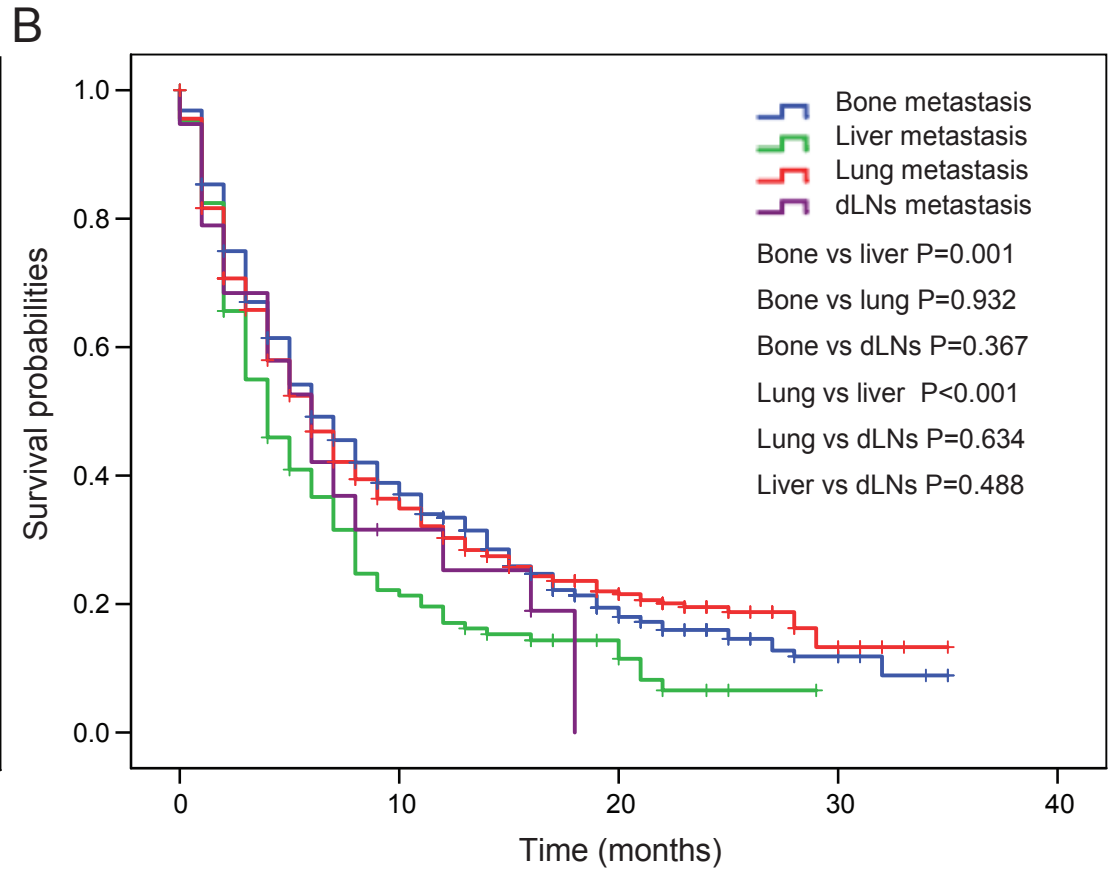

Supplementary figure 7
